# Supplementary figures and images for: Capacity-increasing robust porous SiO2/Si/graphene/C microspheres as an anode for Li-ion batteries
Source: Royal Society of Chemistry journal article supplement (doi:10.1039/c6ra05884a), 2016-01-01

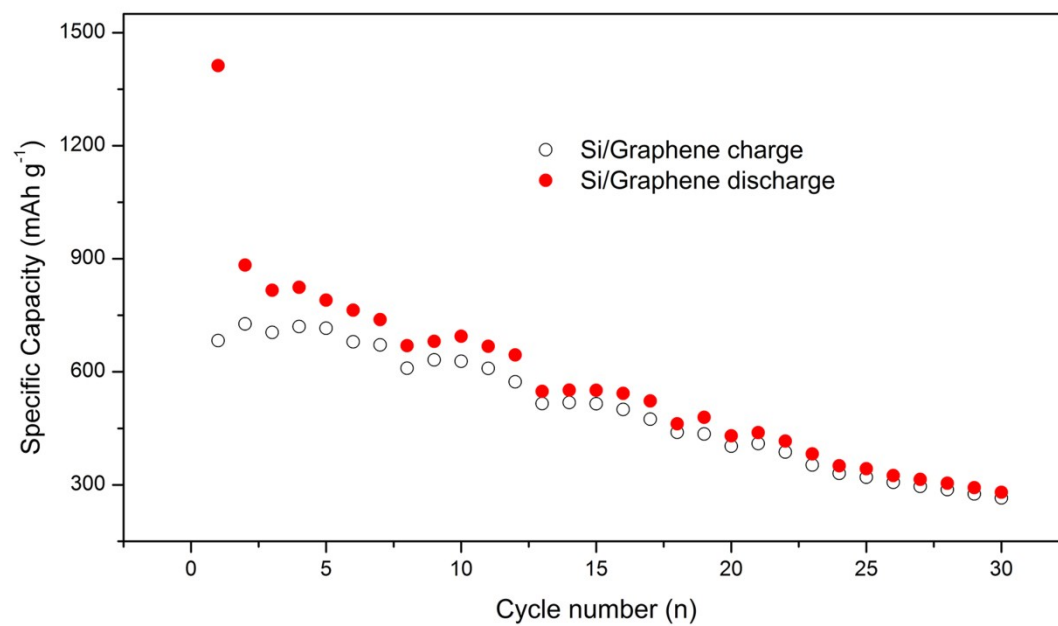

Figure.S1 Cyclability data of physical mixture of Si/Graphene

Supplement: c6ra05884a1.pdf [file c6ra05884a1.pdf]
